# Supplementary material for: Association between inflammation and systolic blood pressure in RA compared to patients without RA
Source: Springer Nature journal article supplement (doi:10.1186/s13075-018-1597-9), 2018-05-31
Supplement: MOESM2 [file 15809316]

Non-RA Outpatient Population NHANES

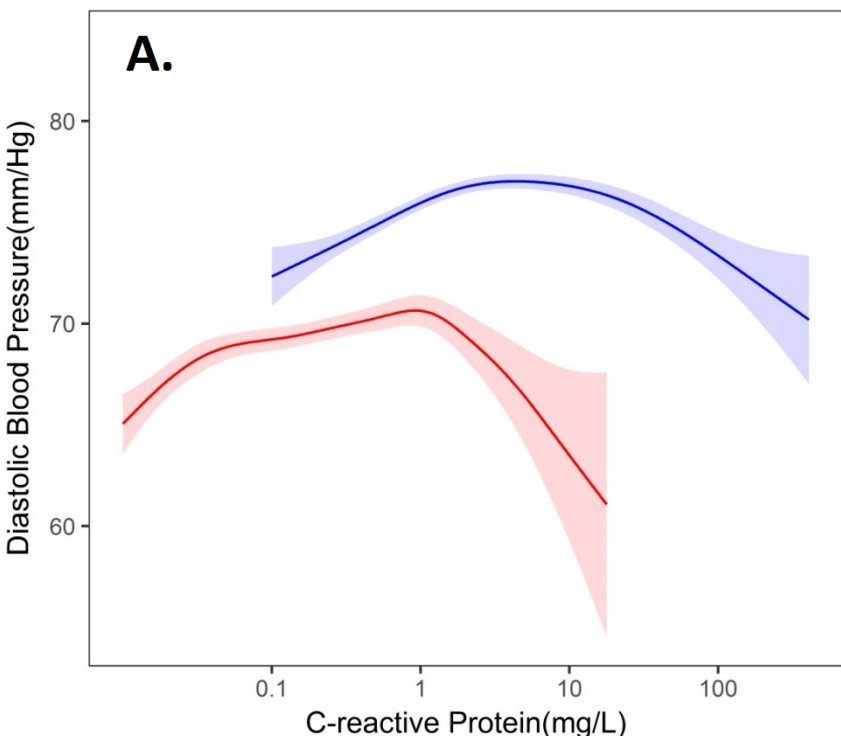

Non-RA Outpatient Population NHANES

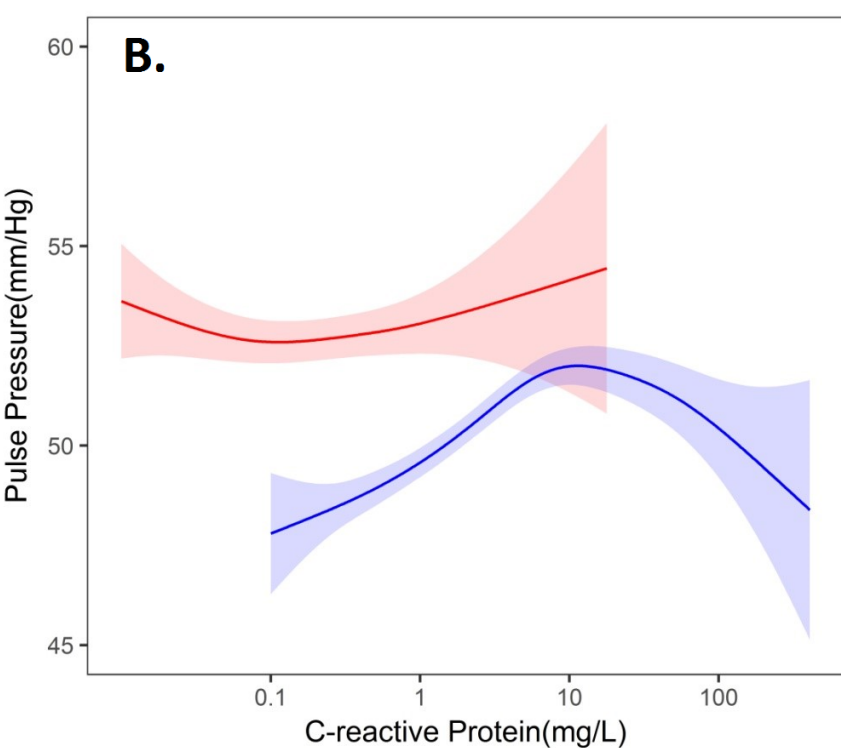

Non-RA Outpatient Population NHANES

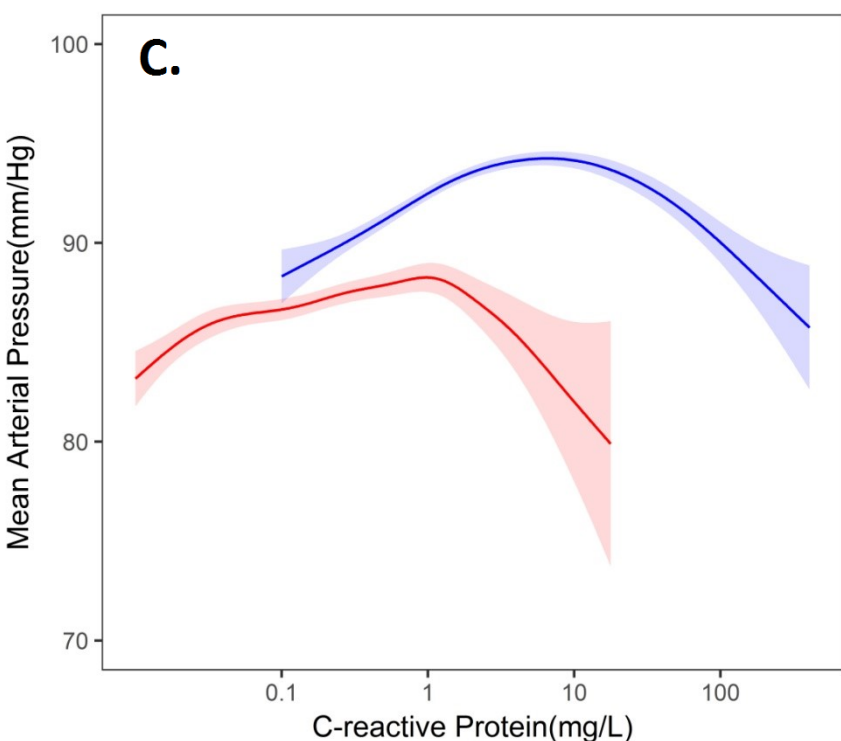

**Figure S2.** Associations between CRP with blood pressure measurements in the non-RA Outpatient Population compared to NHANES, specifically (A) diastolic blood pressure, (B) pulse pressure, and (C) mean arterial pressure.
