# Supplementary material for: Association between inflammation and systolic blood pressure in RA compared to patients without RA
Source: Springer Nature journal article supplement (doi:10.1186/s13075-018-1597-9), 2018-05-31
Supplement: MOESM4 [file 15809316]

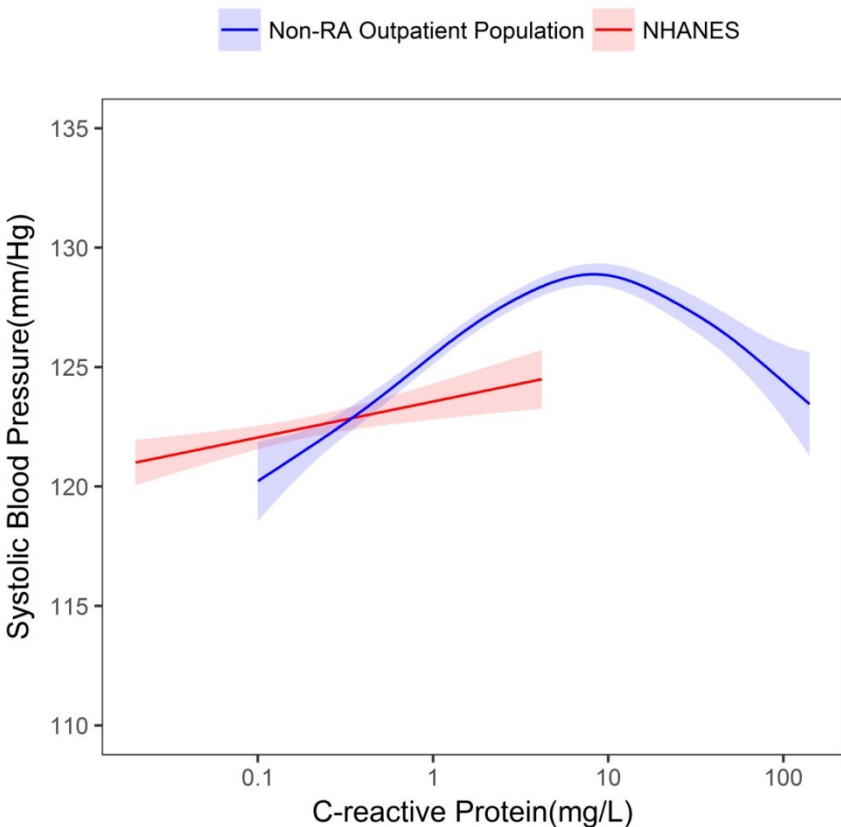

**Figure S4.** Sensitivity analysis demonstrating the relationship between CRP and systolic blood pressure (SBP) in the non-RA Outpatient Population compared to NHANES, where subjects with the 0.5% highest and lowest CRP levels were excluded.
